# Supplementary material
Source: ML conference proceedings conference paper supplement (https://openreview.net/forum?id=PA47sKU8CU)
Supplement: supplementary_material [file IaaW_Appendix.pdf › IaaW-Supplementary-Materials/IaaW_Appendix.pdf]

---

# Image as a World: Generating Interactive World from Single Image via Panoramic Video Generation

---

## Supplementary Materials

**Notes:** More videos are in the supplementary material and best viewed with a 360 video player.

### A Parameters Setup

We present the hyperparameters used in our experiment in Table A. The same hyperparameters are applied to both IaaW-IM and IaaW-CM, and our pipeline is built upon the CogVideoX codebase

| Parameters             | Value       |
|------------------------|-------------|
| Video Height           | 1024        |
| Video Width            | 2048        |
| Video Frames           | 49          |
| Batch Size             | 4           |
| Mixed Precision        | bf16        |
| Optimizer              | AdamW       |
| Optimizer Betas        | (0.9, 0.95) |
| Optimizer Weight Decay | 1e-4        |
| Learning Rate          | 2e-5        |
| Warmup Steps           | 100         |
| Inference Steps        | 25          |
| Frame Per Second       | 16          |
| Masks Number           | 6           |

Table A: Hyperparameters setting of our experiments.

### B Masks Setup

We present our masks setup in Fig. A, which contains six perspectives of one panoramic image/video and these can together seamlessly reconstruct the full panoramic scene.

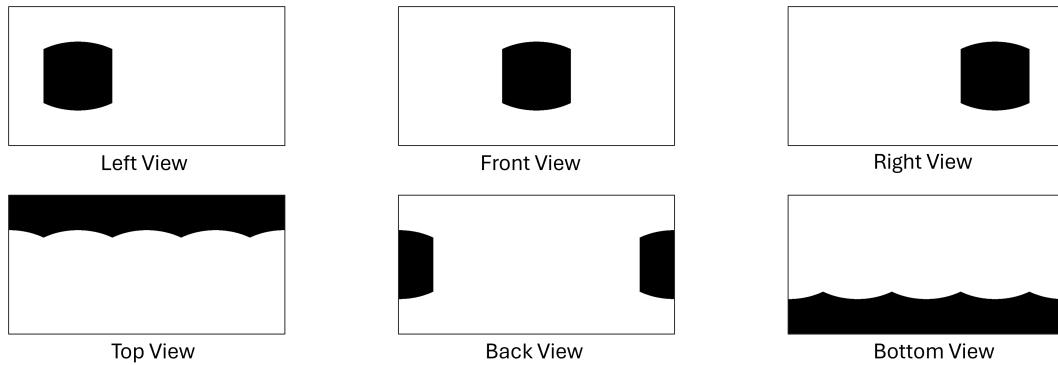

Figure A: Different view masks setup in our method.

## C More Visualization Results

We present additional visualization results of our world initialization in Fig. B, which demonstrate that our method exhibits significant diversity across various scenarios.

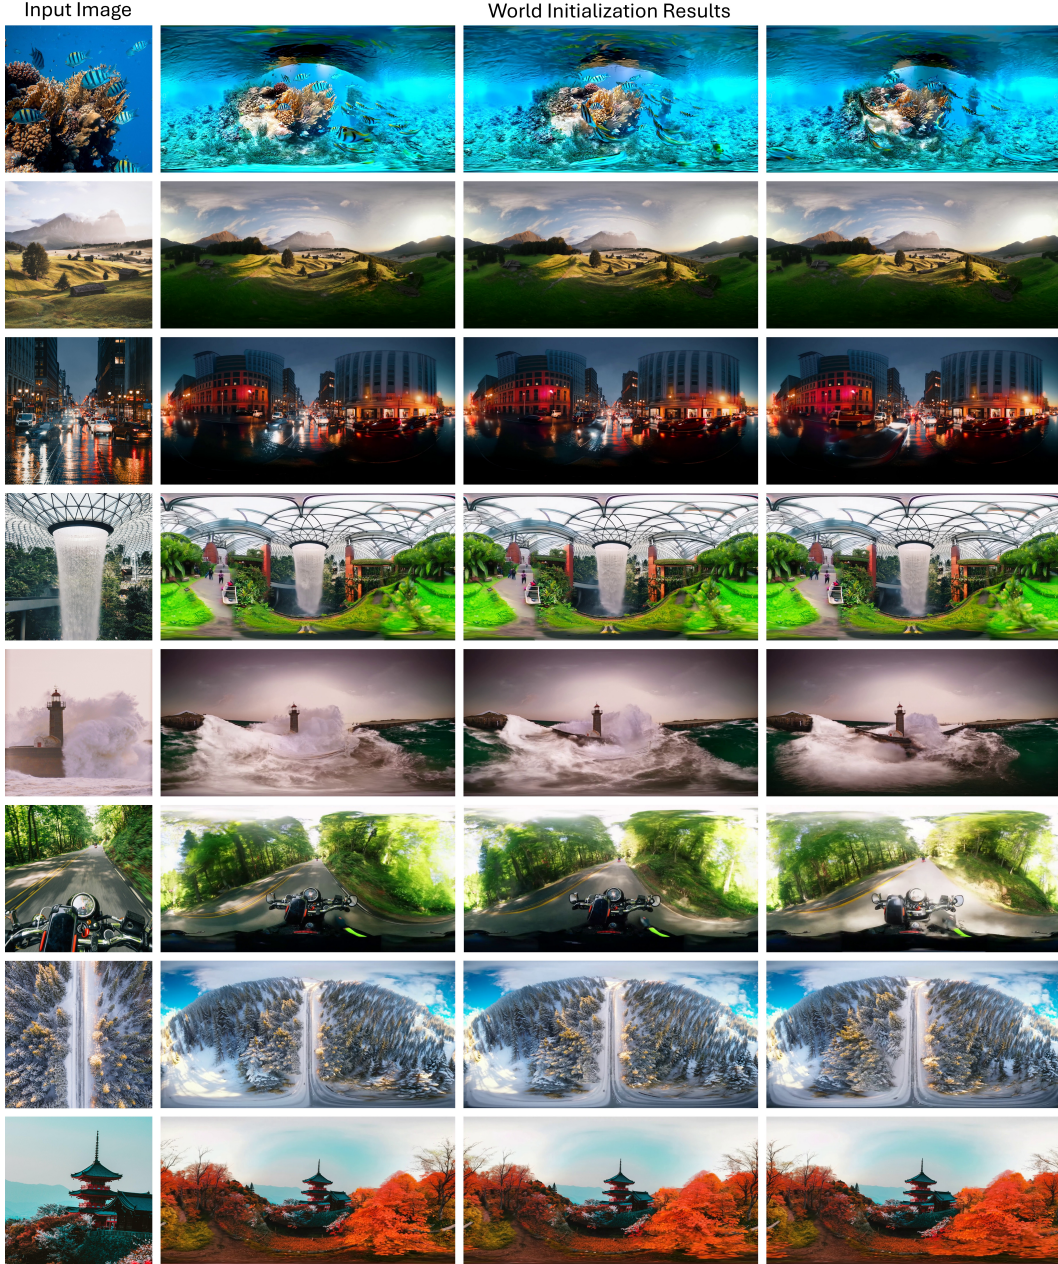

Figure B: More visualization results of world initialization.
